# Supplementary material for: Relationship Between Knowledge and Types of Attitudes Towards People Living with Dementia
Source: PubMed Central journal article supplement (PMC7312095; doi:10.3390/ijerph17113777), 2020-05-26
Supplement: ijerph-17-03777-s001.pdf [file ijerph-17-03777-s001.pdf]

**Table S1.** Distribution of the attitude to dementia in two-by-two tables (persons and %).

|            |     | Shame      |          | Fear       |           | Avoidance  |           |
|------------|-----|------------|----------|------------|-----------|------------|-----------|
|            |     | No         | Yes      | No         | Yes       | No         | Yes       |
| Shame      | No  | -          | -        | -          | -         | -          | -         |
|            | Yes | -          | -        | -          | -         | -          | -         |
| Fear       | No  | 254 (73.2) | 23 (6.6) | -          | -         | -          | -         |
|            | Yes | 58 (16.7)  | 12 (3.5) | -          | -         | -          | -         |
| Avoidance  | No  | 261 (75.2) | 24 (6.9) | 260 (74.9) | 25 (7.2)  | -          | -         |
|            | Yes | 51 (14.7)  | 11 (3.2) | 17 (4.9)   | 45 (13.0) | -          | -         |
| Discomfort | No  | 185 (53.3) | 9 (2.6)  | 184 (53.0) | 10 (2.9)  | 191 (55.0) | 3 (0.9)   |
|            | Yes | 127 (36.6) | 26 (7.5) | 93 (26.8)  | 60 (17.3) | 94 (37.1)  | 59 (17.0) |

Note:  $N = 347$ .

**Table S2.** Distribution of all the combinations of attitudes to dementia (persons and %).

| Shame | Avoidance | Fear | Discomfort = No | Discomfort = Yes |
|-------|-----------|------|-----------------|------------------|
| No    | No        | No   | 175 (50.4%)     | 64 (18.4%)       |
|       |           | Yes  | 8 (2.3%)        | 14 (4.0%)        |
| No    | Yes       | No   | 0               | 15 (4.3%)        |
|       |           | Yes  | 2 (0.6%)        | 34 (9.8%)        |
| Yes   | No        | No   | 8 (2.3%)        | 13 (3.7%)        |
|       |           | Yes  | 0 (6.1%)        | 3 (0.9%)         |
| Yes   | Yes       | No   | 1 (0.3%)        | 0                |
|       |           | Yes  | 0               | 10 (2.9%)        |

Note:  $N = 347$ .
